# Supplementary material for: Integration of human pancreatic islet genomic data refines regulatory mechanisms at Type 2 Diabetes susceptibility loci
Source: eLife. 2018 Feb 7;7:e31977. doi: 10.7554/eLife.31977 (PMC5828664; doi:10.7554/eLife.31977)
Supplement: Figure 4—source data 2. — For each variant that overlaps a genomic annotation included in FGWAS T2D-joint model the following information is provided: rsID; FGWAS PPA; T2D GWAS P-value; FGWAS segment number; T2D locus name; tested for allelic imbalance (Yes/No). If available, the following eQTL information from Varshney et al. (2017) is shown as well: eQTL allele1 (effector), eQTL allele 2, eQTL q-value, eQTL effect and eQTL gene. [file elife-31977-fig4-data2.xlsx]

## Sheet: Sheet1
id	PPA	Pvalue	FGWAS_segment	locus	Allelic_imbalance_test	eQTL_allele1	eQTL_allele2	eQTL_q_value	eQTL_effect	eQTL_gene
rs1472662	0.0204617	1.24326e-05	1	MACF1	No	NA	NA	NA	NA	NA
rs16826069	0.191366	2.23384e-06	1	MACF1	Yes	NA	NA	NA	NA	NA
rs41270807	0.152948	2.83038e-06	1	MACF1	Yes	NA	NA	NA	NA	NA
rs3754346	0.0125364	2.61912e-06	1	MACF1	No	NA	NA	NA	NA	NA
rs16826093	0.0123575	2.64592e-06	1	MACF1	No	NA	NA	NA	NA	NA
rs41270811	0.0123575	2.64592e-06	1	MACF1	No	NA	NA	NA	NA	NA
rs61779278	0.0115939	2.83038e-06	1	MACF1	No	NA	NA	NA	NA	NA
rs2296172	0.143524	3.02714e-06	1	MACF1	Yes	NA	NA	NA	NA	NA
rs3768299	0.0125133	3.23713e-06	1	MACF1	No	NA	NA	NA	NA	NA
rs4660732	0.0129164	3.13045e-06	1	MACF1	No	NA	NA	NA	NA	NA
rs61779285	0.0129164	3.13045e-06	1	MACF1	No	NA	NA	NA	NA	NA
rs61779300	0.0105395	3.13045e-06	1	MACF1	No	NA	NA	NA	NA	NA
rs340883	0.225778	3.72225e-07	2	PROX1	Yes	NA	NA	NA	NA	NA
rs340882	0.531318	1.58682e-07	2	PROX1	Yes	NA	NA	NA	NA	NA
rs340881	0.0117706	1.51293e-06	2	PROX1	No	NA	NA	NA	NA	NA
rs11257655	0.948927	4.18741e-08	4	CDC123/CAMK1D	Yes	T	C	1.46552e-06	6.212	CAMK1D
rs3915932	0.0202632	2.86127e-11	5	ZMIZ1	No	NA	NA	NA	NA	NA
rs810517	0.385993	1.36069e-12	5	ZMIZ1	Yes	NA	NA	NA	NA	NA
rs12571751	0.364928	1.44151e-12	5	ZMIZ1	Yes	NA	NA	NA	NA	NA
rs703982	0.0152697	3.81448e-11	5	ZMIZ1	No	NA	NA	NA	NA	NA
rs703981	0.0358892	1.54297e-11	5	ZMIZ1	No	NA	NA	NA	NA	NA
rs703980	0.0400853	1.37679e-11	5	ZMIZ1	No	NA	NA	NA	NA	NA
rs703977	0.0400853	1.37679e-11	5	ZMIZ1	No	NA	NA	NA	NA	NA
rs703976	0.0699614	7.75624e-12	5	ZMIZ1	No	NA	NA	NA	NA	NA
rs10882106	0.0287931	0	6	HHEX/IDE	No	NA	NA	NA	NA	NA
rs7903146	0.984262	0	7	TCF7L2	Yes	NA	NA	NA	NA	NA
rs11200594	0.0810622	4.87765e-12	8	PLEKHA1/ARMS2*	No	T	C	0.00456199	-4.536	PLEKHA1
rs6585827	0.151655	2.55973e-12	8	PLEKHA1/ARMS2*	Yes	A	G	0.00368967	-4.59	PLEKHA1
rs2421016	0.0382406	1.32272e-11	8	PLEKHA1/ARMS2*	No	T	C	0.00368967	-4.591	PLEKHA1
rs10887150	0.169496	2.27218e-12	8	PLEKHA1/ARMS2*	Yes	A	C	0.00348728	-4.601	PLEKHA1
rs10887151	0.127739	3.05422e-12	8	PLEKHA1/ARMS2*	Yes	T	C	0.00348728	-4.601	PLEKHA1
rs163184	0.0456696	2.91323e-13	9	KCNQ1	No	NA	NA	NA	NA	NA
rs4930011	0.437104	1.78968e-13	9	KCNQ1	Yes	NA	NA	NA	NA	NA
rs2237895	0.0959332	1.39444e-13	9	KCNQ1	No	NA	NA	NA	NA	NA
rs2237896	0.0468771	3.20899e-12	9	KCNQ1	No	NA	NA	NA	NA	NA
rs2237897	0.271732	5.14255e-13	9	KCNQ1	Yes	NA	NA	NA	NA	NA
rs74046911	0.0928495	1.57474e-12	9	KCNQ1	No	NA	NA	NA	NA	NA
rs5213	0.0465076	5.09394e-08	10	KCNJ11	No	NA	NA	NA	NA	NA
rs5215	0.124662	2.7222e-07	10	KCNJ11	Yes	NA	NA	NA	NA	NA
rs5219	0.786574	3.88657e-08	10	KCNJ11	Yes	NA	NA	NA	NA	NA
rs2074314	0.0102629	2.45254e-07	10	KCNJ11	No	NA	NA	NA	NA	NA
rs757110	0.0173712	1.58897e-07	10	KCNJ11	No	NA	NA	NA	NA	NA
rs7935296	0.0602929	2.20088e-08	11	HSD17B12	No	A	C	3.0153e-09	-7.196	HSD17B12
rs6485470	0.0554142	2.40311e-08	11	HSD17B12	No	A	G	3.0153e-09	7.196	HSD17B12
rs11037663	0.0554142	2.40311e-08	11	HSD17B12	No	T	C	3.0153e-09	-7.196	HSD17B12
rs7947967	0.081148	1.61525e-08	11	HSD17B12	No	NA	NA	NA	NA	NA
rs6485473	0.053131	2.51081e-08	11	HSD17B12	No	T	G	3.0153e-09	7.196	HSD17B12
rs7931097	0.0883842	1.47781e-08	11	HSD17B12	No	A	G	2.88968e-09	-7.204	HSD17B12
rs2139153	0.0241411	5.71553e-08	11	HSD17B12	No	A	G	1.64264e-12	8.251	HSD17B12
rs2139154	0.0241411	5.71553e-08	11	HSD17B12	No	A	G	1.64264e-12	-8.251	HSD17B12
rs10734518	0.0471655	2.29978e-08	11	HSD17B12	No	A	G	3.0153e-09	7.196	HSD17B12
rs9971535	0.0189089	5.96491e-08	11	HSD17B12	No	T	C	1.64264e-12	-8.251	HSD17B12
rs9667947	0.0323816	4.49052e-09	12	ARAP1 (CENTD2)	No	T	C	0.0116502	-4.287	STARD10
rs76550717	0.456552	3.73074e-09	12	ARAP1 (CENTD2)	Yes	A	G	0.00431714	-4.549	STARD10
rs75896506	0.298657	5.81162e-09	12	ARAP1 (CENTD2)	Yes	A	G	0.00135527	4.833	STARD10
rs11603349	0.0223423	8.23189e-09	12	ARAP1 (CENTD2)	No	T	C	0.00317135	-4.626	STARD10
rs11602873	0.0332622	5.39974e-09	12	ARAP1 (CENTD2)	No	A	T	0.00317135	-4.626	STARD10
rs79430446	0.011683	1.58684e-08	12	ARAP1 (CENTD2)	No	T	G	0.0100391	4.327	STARD10
rs613937	0.0792928	2.28894e-08	12	ARAP1 (CENTD2)	No	A	G	0.0159894	-4.192	STARD10
rs77106637	0.0141396	1.30408e-08	12	ARAP1 (CENTD2)	No	A	G	0.0166111	4.182	STARD10
rs4931479	0.0117533	7.78266e-07	14	KLHDC5	No	T	C	0.00135527	-4.833	KLHL42
rs3751235	0.0150261	5.15613e-07	14	KLHDC5	No	T	C	2.53913e-06	-6.118	KLHL42
rs10842987	0.0141618	7.01167e-07	14	KLHDC5	No	A	C	0.000178327	5.288	KLHL42
rs10842988	0.0156511	6.33711e-07	14	KLHDC5	No	A	G	3.21859e-05	-5.638	KLHL42
rs10771369	0.0151633	6.5521e-07	14	KLHDC5	No	C	G	3.21859e-05	-5.638	KLHL42
rs10771370	0.014236	7.00266e-07	14	KLHDC5	No	A	G	3.21859e-05	5.638	KLHL42
rs10842989	0.0156511	6.33711e-07	14	KLHDC5	No	T	C	3.21859e-05	-5.638	KLHL42
rs10771371	0.0117918	8.54106e-07	14	KLHDC5	No	A	G	3.21859e-05	-5.638	KLHL42
rs4931494	0.0744255	1.21645e-06	14	KLHDC5	No	NA	NA	NA	NA	NA
rs10842991	0.128353	7.6634e-07	14	KLHDC5	Yes	T	C	3.21859e-05	-5.636	KLHL42
rs10771372	0.214066	4.38102e-07	14	KLHDC5	Yes	T	C	3.21859e-05	-5.635	KLHL42
rs7953190	0.0222212	4.38102e-07	14	KLHDC5	No	T	C	3.21859e-05	5.635	KLHL42
rs7966976	0.0222212	4.38102e-07	14	KLHDC5	No	A	G	3.21859e-05	-5.635	KLHL42
rs7970193	0.0208418	4.6868e-07	14	KLHDC5	No	A	G	3.21859e-05	-5.634	KLHL42
rs3751236	0.0208418	4.6868e-07	14	KLHDC5	No	A	G	3.21859e-05	-5.634	KLHL42
rs3751237	0.0208418	4.6868e-07	14	KLHDC5	No	T	G	3.21859e-05	5.634	KLHL42
rs3751239	0.02152	4.53142e-07	14	KLHDC5	No	C	G	3.27709e-05	5.634	KLHL42
rs10842992	0.207311	4.53142e-07	14	KLHDC5	Yes	T	C	3.27709e-05	5.634	KLHL42
rs10842993	0.0154484	6.53016e-07	14	KLHDC5	No	A	G	3.27709e-05	-5.633	KLHL42
rs11049161	0.014692	6.77377e-07	14	KLHDC5	No	T	C	3.27709e-05	-5.633	KLHL42
rs57195659	0.0141618	7.01167e-07	14	KLHDC5	No	A	G	3.27709e-05	-5.633	KLHL42
rs10842994	0.0145984	6.95916e-07	14	KLHDC5	No	T	C	3.27709e-05	-5.631	KLHL42
rs715120	0.661031	1.38129e-07	15	CABP1	Yes	NA	NA	NA	NA	NA
rs4766975	0.0500803	1.87441e-07	15	CABP1	No	NA	NA	NA	NA	NA
rs4767921	0.0665525	1.40954e-07	15	CABP1	No	NA	NA	NA	NA	NA
rs56182086	0.0136623	8.00482e-07	15	CABP1	No	NA	NA	NA	NA	NA
rs67075643	0.0489386	9.40604e-08	16	HNF1A (TCF1)	No	NA	NA	NA	NA	NA
rs7965349	0.195948	1.40266e-07	16	HNF1A (TCF1)	Yes	NA	NA	NA	NA	NA
rs1215468	0.258571	1.88824e-09	17	SPRY2	Yes	NA	NA	NA	NA	NA
rs4502156	0.0556434	1.3933e-07	18	C2CD4A	No	NA	NA	NA	NA	NA
rs7163757	0.384728	1.95833e-07	18	C2CD4A	Yes	T	C	0.0203354	-4.124	C2CD4B
rs7161785	0.0383001	2.04588e-07	18	C2CD4A	No	C	G	0.0203354	-4.124	C2CD4B
rs7167878	0.0562633	1.3606e-07	18	C2CD4A	No	A	C	0.0203354	-4.124	C2CD4B
rs10083587	0.0336799	2.38301e-07	18	C2CD4A	No	T	C	0.0328018	-3.979	C2CD4B
rs1421085	0.0146038	0	20	FTO	No	NA	NA	NA	NA	NA
rs760538433,rs9972653	0.0232179	0	20	FTO	No	NA	NA	NA	NA	NA
rs72802391	0.124974	6.48673e-09	21	BCAR1	Yes	NA	NA	NA	NA	NA
rs72802395	0.334511	2.2895e-09	21	BCAR1	Yes	NA	NA	NA	NA	NA
rs12443634	0.0520655	1.46333e-06	22	CMIP	No	NA	NA	NA	NA	NA
rs56823429	0.182182	3.88251e-07	22	CMIP	Yes	NA	NA	NA	NA	NA
rs62066047	0.0768851	1.14334e-07	23	GLP2R	No	NA	NA	NA	NA	NA
rs62066057	0.24412	2.13136e-07	23	GLP2R	Yes	NA	NA	NA	NA	NA
rs62066058	0.0373793	2.4165e-07	23	GLP2R	No	NA	NA	NA	NA	NA
rs74382177	0.507632	7.46241e-10	27	THADA	Yes	NA	NA	NA	NA	NA
rs6743071	0.0462181	8.55565e-10	27	THADA	No	NA	NA	NA	NA	NA
rs76857293	0.0370499	1.07929e-09	27	THADA	No	NA	NA	NA	NA	NA
rs79625619	0.0232618	1.75932e-09	27	THADA	No	NA	NA	NA	NA	NA
rs76215753	0.0314163	1.28357e-09	27	THADA	No	NA	NA	NA	NA	NA
rs78681698	0.15443	1.52527e-09	27	THADA	Yes	NA	NA	NA	NA	NA
rs79629200	0.0297425	1.35961e-09	27	THADA	No	NA	NA	NA	NA	NA
rs74469180	0.0305667	1.3211e-09	27	THADA	No	NA	NA	NA	NA	NA
rs7567685	0.0607536	8.76419e-10	28	THADA	No	NA	NA	NA	NA	NA
rs7581586	0.0607536	8.76419e-10	28	THADA	No	NA	NA	NA	NA	NA
rs7567535	0.0607536	8.76419e-10	28	THADA	No	NA	NA	NA	NA	NA
rs17030800	0.0114419	7.99988e-10	28	THADA	No	NA	NA	NA	NA	NA
rs79955955	0.0812435	6.46152e-10	28	THADA	No	NA	NA	NA	NA	NA
rs77791126	0.0350423	2.47556e-10	28	THADA	No	NA	NA	NA	NA	NA
rs10189235	0.0391405	2.21287e-10	28	THADA	No	NA	NA	NA	NA	NA
rs76851696	0.0340108	2.55423e-10	28	THADA	No	NA	NA	NA	NA	NA
rs79271345	0.0282128	3.10847e-10	28	THADA	No	NA	NA	NA	NA	NA
rs6726643	0.0204562	3.51798e-10	28	THADA	No	NA	NA	NA	NA	NA
rs6726917	0.021069	3.41086e-10	28	THADA	No	NA	NA	NA	NA	NA
rs243018	0.475298	1.21423e-07	29	BCL11A	Yes	NA	NA	NA	NA	NA
rs2943656	0.116385	5.30002e-08	30	IRS1	Yes	NA	NA	NA	NA	NA
rs1515110	0.0387481	2.62875e-08	30	IRS1	No	NA	NA	NA	NA	NA
rs1515096	0.0233868	2.93116e-07	30	IRS1	No	NA	NA	NA	NA	NA
rs116315292	0.0210763	1.04931e-07	31	MTMR3/HORMAD2*	No	NA	NA	NA	NA	NA
rs77302496	0.011079	2.08293e-07	31	MTMR3/HORMAD2*	No	NA	NA	NA	NA	NA
rs73883313	0.0198531	1.12094e-07	31	MTMR3/HORMAD2*	No	NA	NA	NA	NA	NA
rs73392888	0.0139193	1.3202e-07	31	MTMR3/HORMAD2*	No	NA	NA	NA	NA	NA
rs7289803	0.0164851	1.10174e-07	31	MTMR3/HORMAD2*	No	NA	NA	NA	NA	NA
rs36589	0.0165817	1.36223e-07	31	MTMR3/HORMAD2*	No	NA	NA	NA	NA	NA
rs76176802	0.0209117	1.0647e-07	31	MTMR3/HORMAD2*	No	NA	NA	NA	NA	NA
rs16988148	0.0158197	1.15518e-07	31	MTMR3/HORMAD2*	No	NA	NA	NA	NA	NA
rs7286441	0.0148426	1.23465e-07	31	MTMR3/HORMAD2*	No	NA	NA	NA	NA	NA
rs55645000	0.0181898	1.23465e-07	31	MTMR3/HORMAD2*	No	NA	NA	NA	NA	NA
rs45629133	0.0142463	1.28804e-07	31	MTMR3/HORMAD2*	No	NA	NA	NA	NA	NA
rs73883354	0.0169574	1.07304e-07	31	MTMR3/HORMAD2*	No	NA	NA	NA	NA	NA
rs73883355	0.0169574	1.07304e-07	31	MTMR3/HORMAD2*	No	NA	NA	NA	NA	NA
rs5763878	0.0359258	5.99601e-08	31	MTMR3/HORMAD2*	No	NA	NA	NA	NA	NA
rs2412980	0.0744886	3.09793e-07	31	MTMR3/HORMAD2*	No	NA	NA	NA	NA	NA
rs6518681	0.0101429	2.30896e-07	31	MTMR3/HORMAD2*	No	NA	NA	NA	NA	NA
rs11708067	0.919716	9.58345e-13	35	ADCY5	Yes	A	G	7.36763e-06	-5.925	ADCY5
rs6786649	0.0462492	0	37	IGF2BP2	No	A	C	0.0432647	-3.89	IGF2BP2
rs7646518	0.0788816	0	37	IGF2BP2	No	T	C	0.0432647	3.89	IGF2BP2
rs10428126	0.0538569	0	37	IGF2BP2	No	T	C	0.0432647	3.89	IGF2BP2
rs4234731,rs71635954,rs881796	0.0264949	1.26565e-14	38	WFS1	No	NA	NA	NA	NA	NA
rs3821943	0.936658	2.22045e-16	38	WFS1	Yes	NA	NA	NA	NA	NA
rs879779	0.0112889	9.48599e-06	39	ACSL1*	No	NA	NA	NA	NA	NA
rs1996546	0.11259	8.82403e-07	39	ACSL1*	Yes	NA	NA	NA	NA	NA
rs735949	0.0788043	1.2672e-06	39	ACSL1*	No	NA	NA	NA	NA	NA
rs735948	0.0712317	1.41514e-06	39	ACSL1*	No	NA	NA	NA	NA	NA
rs72695653	0.0712317	1.41514e-06	39	ACSL1*	No	NA	NA	NA	NA	NA
rs72695654	0.0712317	1.41514e-06	39	ACSL1*	No	NA	NA	NA	NA	NA
rs72695656	0.0712317	1.41514e-06	39	ACSL1*	No	NA	NA	NA	NA	NA
rs11132255	0.020908	3.68907e-07	39	ACSL1*	No	NA	NA	NA	NA	NA
rs56376363	0.0849508	1.16635e-06	39	ACSL1*	No	NA	NA	NA	NA	NA
rs55939217	0.0873273	1.13276e-06	39	ACSL1*	No	NA	NA	NA	NA	NA
rs13173241	0.761329	1.68608e-09	40	AC022431.2|ANKRD55	Yes	NA	NA	NA	NA	NA
rs12530627	0.0889915	4.12732e-07	43	ETV1|DGKB	No	NA	NA	NA	NA	NA
rs11768118	0.792352	4.48238e-07	43	ETV1|DGKB	Yes	NA	NA	NA	NA	NA
rs10228796	0.0255667	2.19731e-07	44	DGKB	No	NA	NA	NA	NA	NA
rs10258074	0.320102	1.57772e-08	44	DGKB	Yes	NA	NA	NA	NA	NA
rs2191348	0.320102	1.57772e-08	44	DGKB	Yes	NA	NA	NA	NA	NA
rs2191349	0.202219	2.54374e-08	44	DGKB	Yes	NA	NA	NA	NA	NA
rs702814	0.0317442	7.76268e-13	45	JAZF1	No	NA	NA	NA	NA	NA
rs849142	0.050686	6.37268e-14	45	JAZF1	No	NA	NA	NA	NA	NA
rs1635852	0.735411	3.08642e-14	45	JAZF1	Yes	NA	NA	NA	NA	NA
rs849133	0.108774	3.59712e-14	45	JAZF1	Yes	NA	NA	NA	NA	NA
rs1513272	0.0284829	1.15907e-13	45	JAZF1	No	NA	NA	NA	NA	NA
rs917195	0.873785	2.05042e-06	46	CRHR2	Yes	NA	NA	NA	NA	NA
rs917196	0.0399723	5.35105e-05	46	CRHR2	No	NA	NA	NA	NA	NA
rs58682124	0.0421383	5.05693e-05	46	CRHR2	No	NA	NA	NA	NA	NA
rs6986080	0.0196656	1.59285e-05	47	ANK1	No	C	G	0.0254894	4.057	NKX6-3
rs516946	0.0526774	8.7023e-07	47	ANK1	No	T	C	0.0141326	4.227	NKX6-3
rs508419	0.359694	1.23885e-06	47	ANK1	Yes	A	G	0.0141326	4.227	NKX6-3
rs9694034	0.315635	1.42183e-06	47	ANK1	Yes	A	G	0.0141326	-4.227	NKX6-3
rs6989203	0.0233943	2.06793e-06	47	ANK1	No	A	G	0.0141326	4.227	NKX6-3
rs10109812	0.030701	1.5228e-06	47	ANK1	No	A	G	0.0141326	-4.227	NKX6-3
rs13266634	0.980485	0	48	SLC30A8	Yes	NA	NA	NA	NA	NA
rs3802177	0.0111026	0	48	SLC30A8	No	NA	NA	NA	NA	NA
rs4300038	0.998375	0	49	SLC30A8	Yes	NA	NA	NA	NA	NA
rs3890400	0.202907	4.39815e-08	50	HSF1	Yes	NA	NA	NA	NA	NA
rs3757974	0.141789	6.39427e-08	50	HSF1	Yes	NA	NA	NA	NA	NA
rs3757972	0.286718	3.08118e-08	50	HSF1	Yes	NA	NA	NA	NA	NA
rs3757971	0.144909	6.40391e-08	50	HSF1	Yes	NA	NA	NA	NA	NA
rs3757970	0.159704	5.6471e-08	50	HSF1	Yes	NA	NA	NA	NA	NA
rs10811660	0.76993	2.22045e-16	51	CDKN2A/B	Yes	NA	NA	NA	NA	NA
rs2506124	0.0202677	3.20026e-06	52	TLE1	No	NA	NA	NA	NA	NA
rs2244337	0.0442281	1.3903e-06	52	TLE1	No	NA	NA	NA	NA	NA
