# Supplementary material for: Integration of human pancreatic islet genomic data refines regulatory mechanisms at Type 2 Diabetes susceptibility loci
Source: eLife journal article supplement (doi:10.7554/elife.31977), 2018-02-07
Supplement: supp [file elife_poa_e31977_Figure_1_figure_supplement_1.pdf › elife_poa_e31977_Figure_1_figure_supplement_1.pdf]

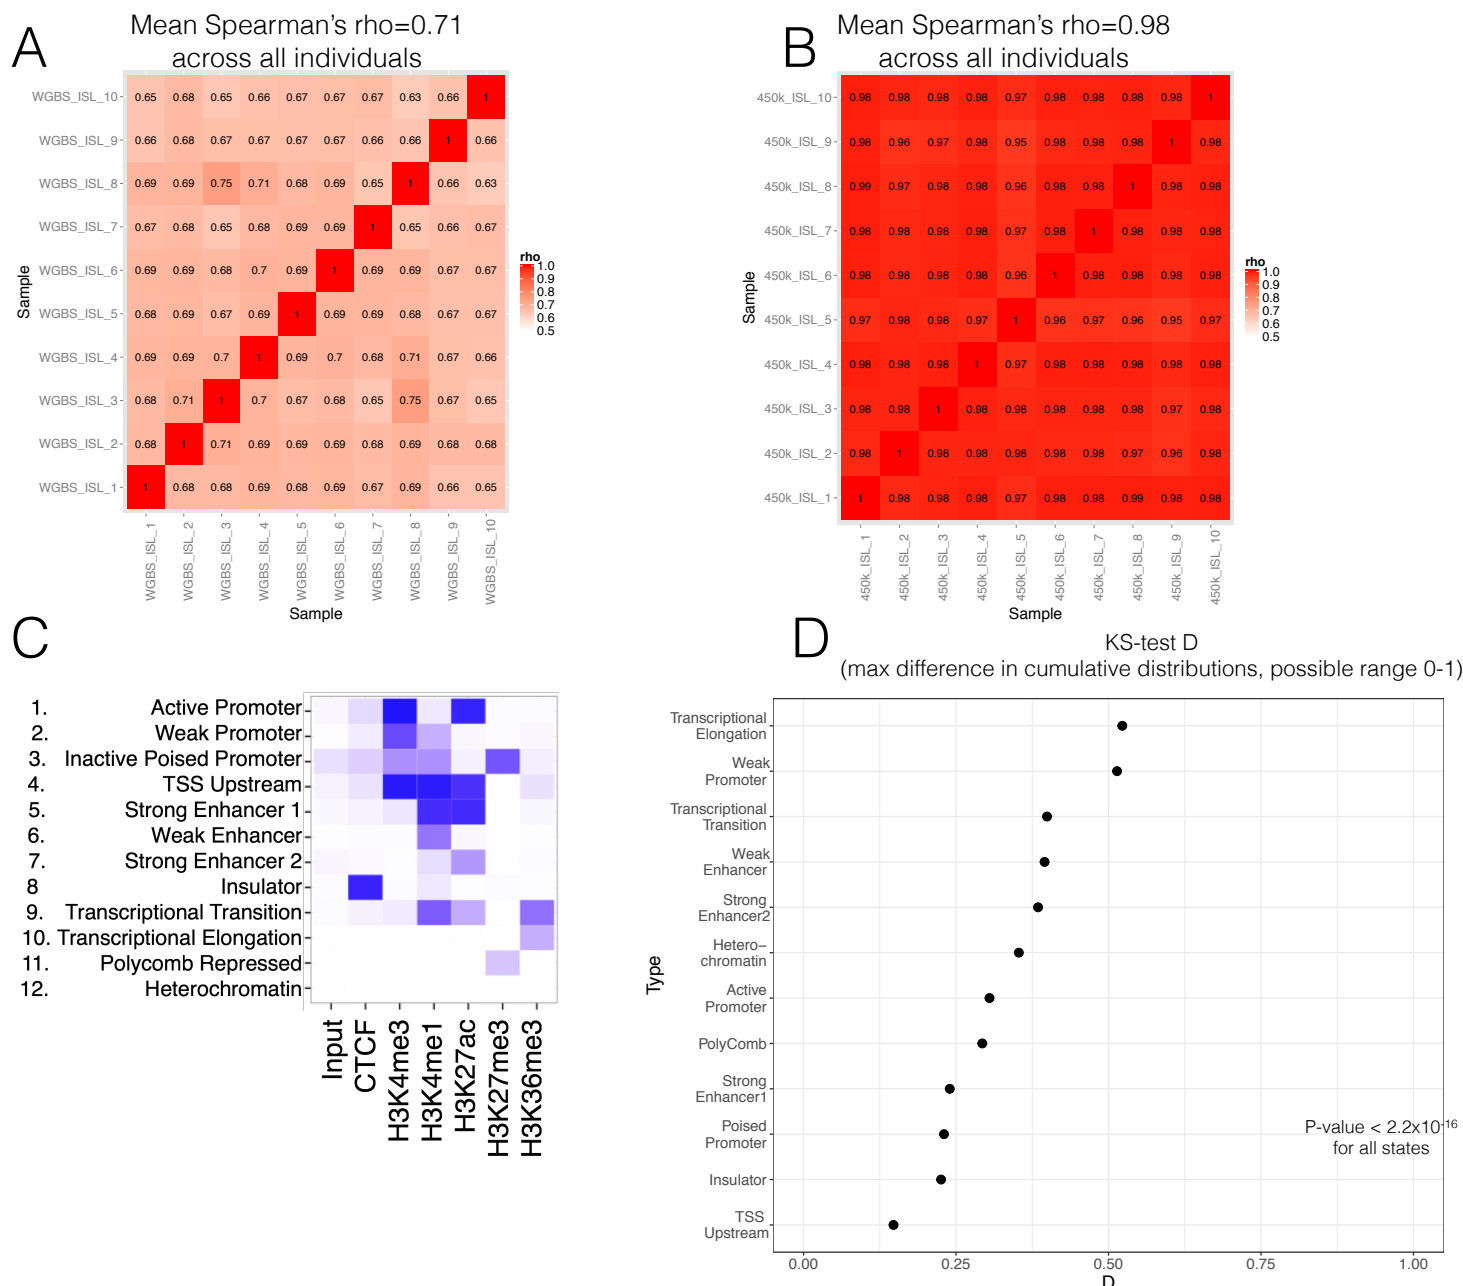

**SUPPLEMENTARY FIGURE 1. Correlation of DNA methylation across WGBS and 450k sites and comparison of WGBS and 450k methylation levels across chromatin states** A-B) Spearman's rho correlation of DNA methylation across 10 individual (A) WGBS and (B) 10 selected (out of 32) 450k samples on the x-axis and y-axis. C) Islet chromatin state definitions based on ChIP-seq data reproduced from Parker et al 2013. TSS: Transcription Start Site D) The differences in the 450k and WGBS methylation level distribution measured as D statistic, which represents the difference in the cumulative distributions and is derived from the Kolmogorov-Smirnov test, are shown for each chromatin state separately.
