# Supplementary material for: Integration of human pancreatic islet genomic data refines regulatory mechanisms at Type 2 Diabetes susceptibility loci
Source: eLife journal article supplement (doi:10.7554/elife.31977), 2018-02-07
Supplement: supp [file elife_poa_e31977_Figure_1_figure_supplement_2.pdf › elife_poa_e31977_Figure_1_figure_supplement_2.pdf]

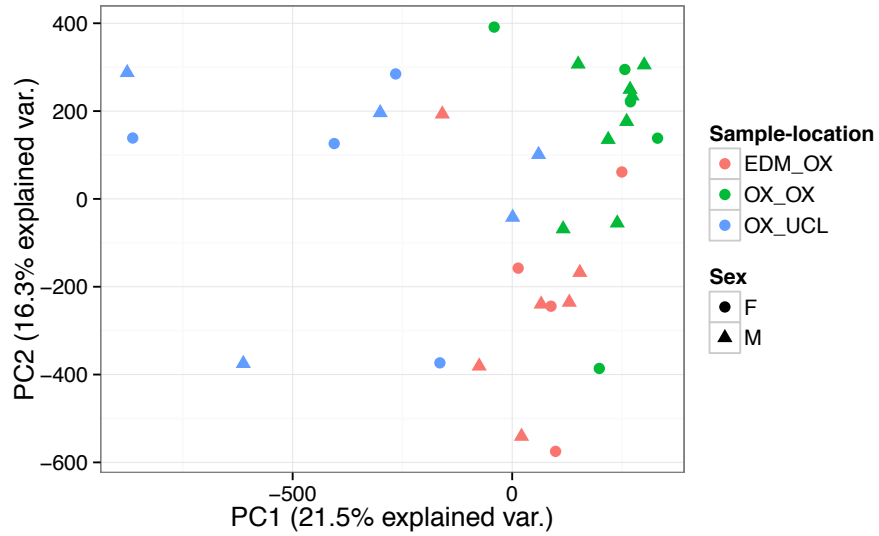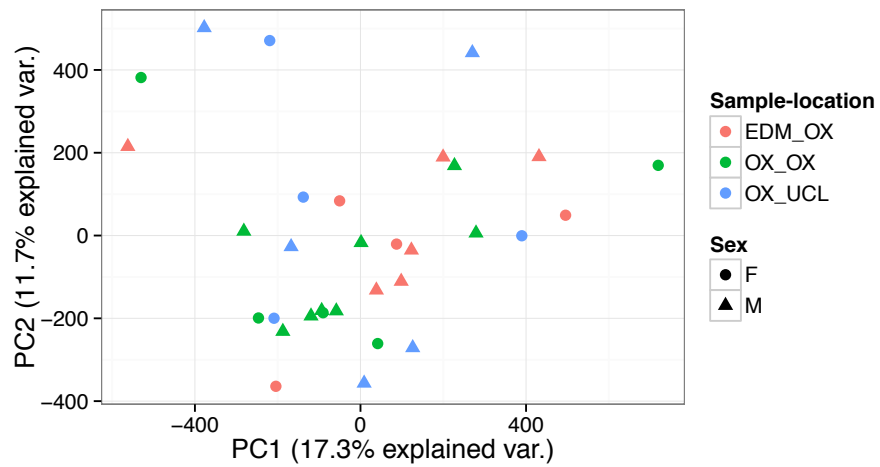

**SUPPLEMENTARY FIGURE 7.** A-B) PCA analysis of 450k DNA methylation data of 32 human islet samples coloured according to the location of origin and processing (A) before correction for Sample-location and (B) after correction for Sample-location using the ComBat function included in the sva package. The shape indicates sex. Sample location **EDM\_OX**: samples obtained from the Alberta Diabetes Institute in Edmonton (Canada) and processed at the University of Oxford. **OX\_OX**: samples obtained from Oxford DRWF Human Islet Isolation Facility and processed at the University of Oxford. **OX\_UCL**: samples obtained from Oxford DRWF Human Islet Isolation Facility and processed at University College London.
