# Supplementary material for: Integration of human pancreatic islet genomic data refines regulatory mechanisms at Type 2 Diabetes susceptibility loci
Source: eLife journal article supplement (doi:10.7554/elife.31977), 2018-02-07
Supplement: supp [file elife_poa_e31977_Figure_4_figure_supplement_1.pdf › elife_poa_e31977_Figure_4_figure_supplement_1.pdf]

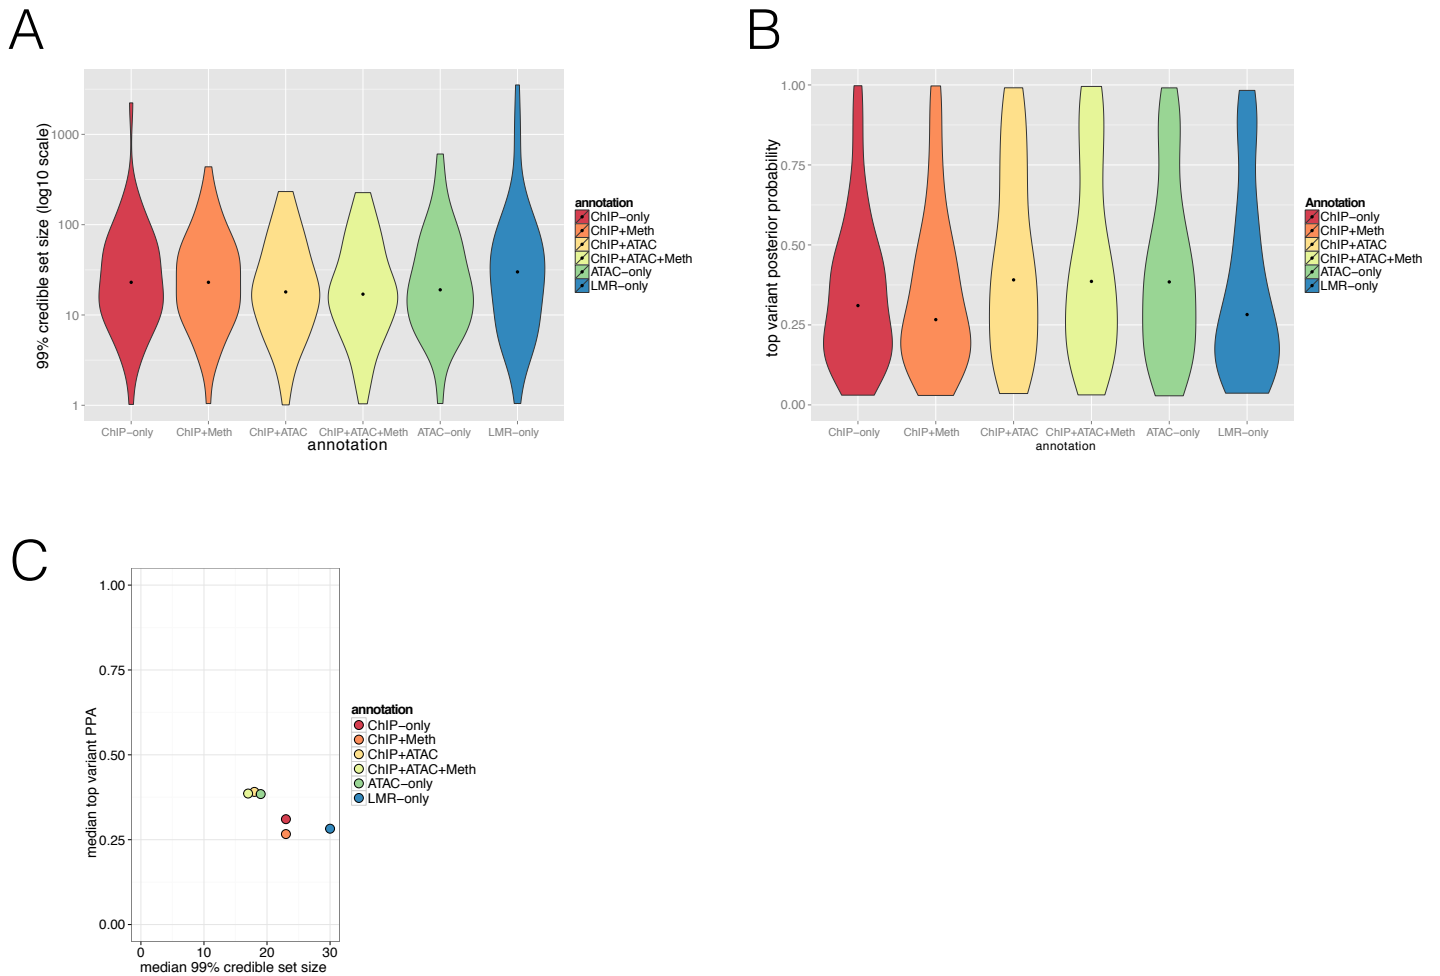

**Supplementary Figure 5. Evaluating annotation effect on Posterior Probabilities (PPA) derived from the FGWAS maximum likelihood model at significant T2D GWAS loci.** (A) Violin plot showing the distribution of 99% credible set variant size (y-axis, log10 scale) of different annotation types used (x-axis, ChIP-only, ChIP+Meth, ChIP+ATAC, ChIP+ATAC+Meth, ATAC-only and LMR-only model). (B) Violin plot showing the distribution in the maximum single variant PPA (y-axis) of different annotation types used (x-axis, ChIP-only, ChIP+Meth, ChIP+ATAC, ChIP+ATAC+Meth, ATAC-only and LMR-only model). Dots indicate mean value. (C) Median 99% credible set variant size (x-axis) and median top variant PPA (y-axis) information for ChIP-only, ChIP+Meth, ChIP+ATAC, ChIP+ATAC+Meth, ATAC-only and LMR-only models.
